# Supplementary material for: In Vitro Photoinactivation of Fusarium oxysporum Conidia with Light-Activated Ammonium Phthalocyanines
Source: MDPI journal article supplement (doi:10.3390/ijms24043922), 2023-02-15
Supplement: s1 [file s1]

## *Supporting Information*

# **In Vitro Photoinactivation of *Fusarium oxysporum* Conidia by Light-Activated Ammonium Phthalocyanines**

Sara R.D. Gamelas <sup>1</sup>, Isabel N. Sierra-Garcia <sup>2</sup>, Augusto C. Tomé <sup>1</sup>, Ângela Cunha <sup>2,\*</sup>  
and Leandro M.O. Lourenço <sup>1,\*</sup>

<sup>1</sup> LAQV-REQUIMTE, Department of Chemistry, University of Aveiro, 3810-193 Aveiro, Portugal.

<sup>2</sup> CESAM, Department of Biology, University of Aveiro, 3810-193 Aveiro, Portugal.

\* Correspondence: acunha@ua.pt (A.C.); leandrolourenco@ua.pt (L.M.O.L.)

## **Contents**

|                                                                                           |   |
|-------------------------------------------------------------------------------------------|---|
| 1. NMR spectroscopy .....                                                                 | 2 |
| 2. Photosensitization of <i>Fusarium oxysporum</i> conidia at low PS concentrations ..... | 5 |

## 1. NMR spectroscopy

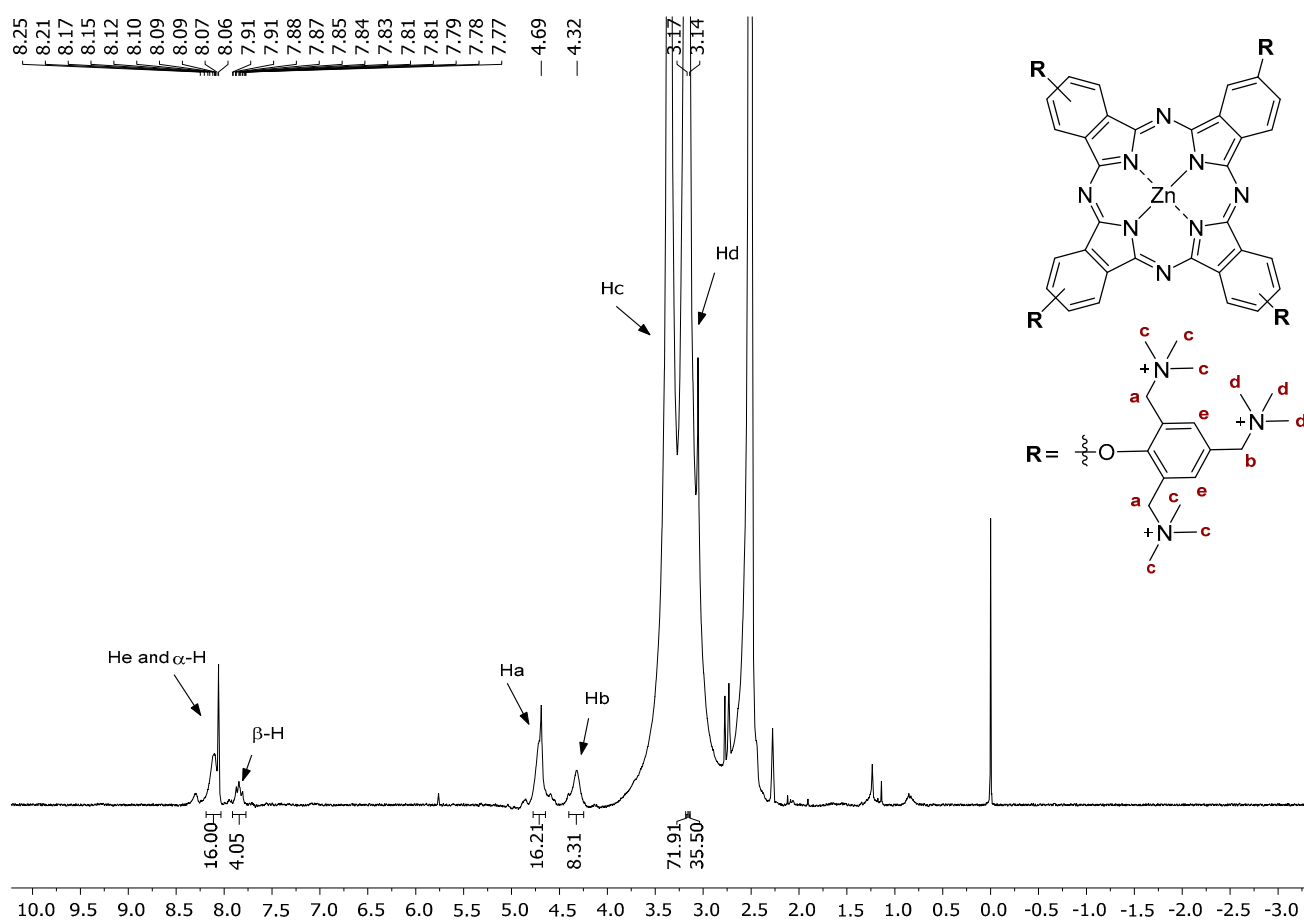

**Figure S1.** <sup>1</sup>H NMR (300.13 MHz) spectrum of PS **1** in DMSO-*d*<sub>6</sub>.

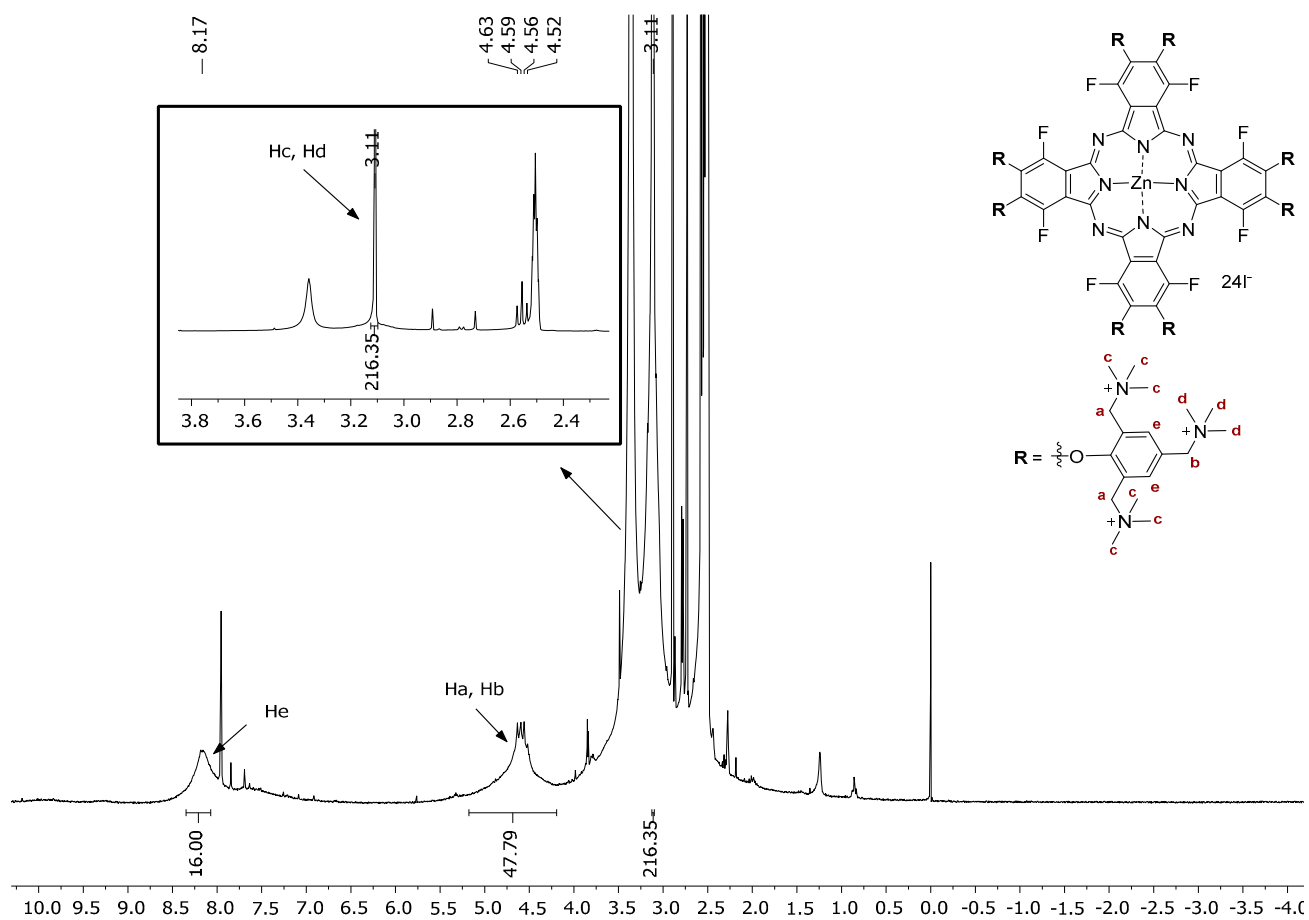

**Figure S2.**  $^1\text{H}$  NMR (300.13 MHz) spectrum of PS **2** in  $\text{DMSO}-d_6$ .

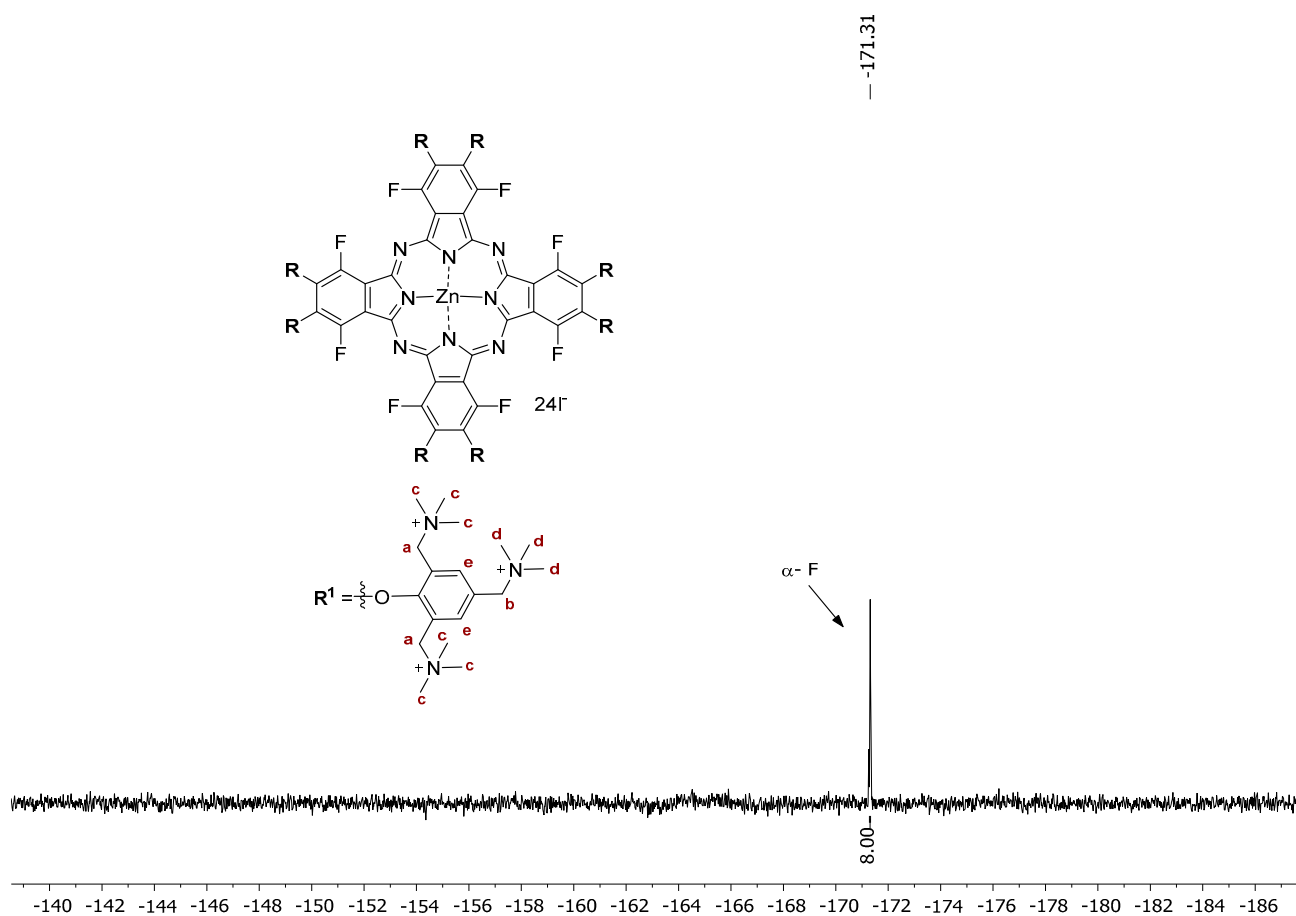

**Figure S3.**  $^{19}\text{F}$  NMR (282.38 MHz) spectrum of PS **2** in  $\text{DMSO-}d_6$ .

## 2. Photosensitization of *Fusarium oxysporum* conidia at low PS concentrations

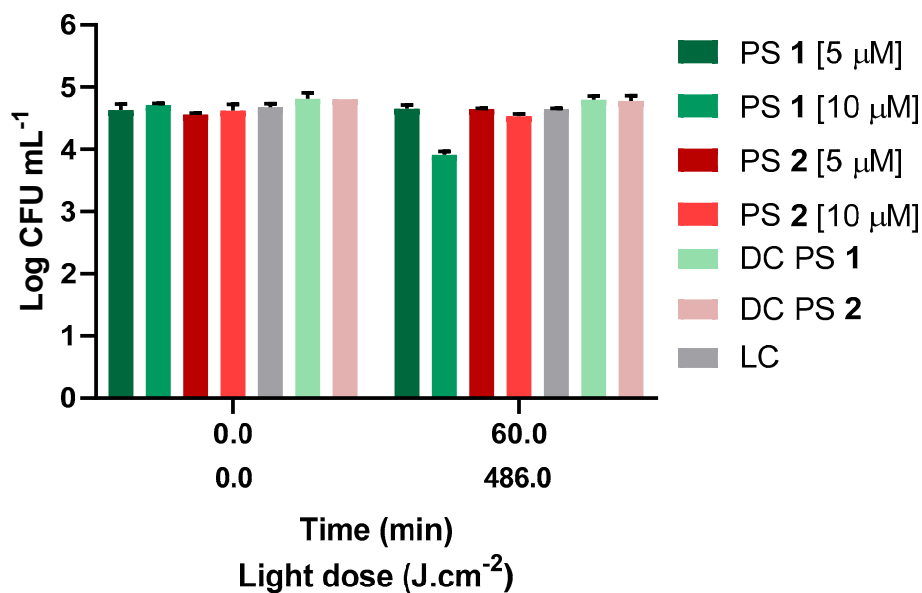

**Figure S4.** Variation of the concentration of viable conidia of *Fusarium oxysporum* in presence of the PS 1 and 2 at low concentrations (5 and 10 μM), exposed under white light irradiation for 60 min (irradiance of 135 mW.cm<sup>-2</sup>, light dose of 486 J.cm<sup>-2</sup>). LC – light control; DC PS 1 – dark control with PS 1; DC PS 2 – dark control with PS 2. Values are the mean of three replicate counts. Error bars represent the standard deviation.
